# Supplementary material
Source: HighWire-hosted journal article supplement (http://dmd.aspetjournals.org/highwire/filestream/75657/field_highwire_adjunct_files/2/DMD_000099_Revised_Supplemental_Table_2.pdf)

[Title] Impact of P-glycoprotein-mediated active efflux on drug distribution into lumbar cerebrospinal fluid in nonhuman primates

[Authors] Yoko Nagaya, Kazuhide Katayama, Hiroyuki Kusuhara, Yoshitane Nozaki

[Journal] Drug Metabolism and Disposition

[Manuscript number] DMD-AR-2020-000099

**Supplemental Table 2. Comparison of  $K_{p,uu,lumbar\ CSF}$  values with  $C_{CSF}/C_{u,plasma}$  at 24 hours after starting infusion**

The  $K_{p,uu,lumbar\ CSF}$  values were compared with the  $C_{CSF}$ -to- $C_{u,plasma}$  ratios ( $C_{CSF}/C_{u,plasma}$ ) at 24 hours after starting infusion in animal study Part 1 (A) and Part 2 (B). The correlation is graphically shown in (C). The  $K_{p,uu,lumbar\ CSF}$  values were obtained from Table 1 or Table 2.

(A) Part 1

| Test compounds | $K_{p,uu,lumbar\ CSF}$ | $C_{CSF}/C_{u,plasma}$ at 24 h | Fold difference |
|----------------|------------------------|--------------------------------|-----------------|
| Antipyrine     | 1.10 ± 0.15            | 0.924 ± 0.323                  | 1.2             |
| Carbamazepine  | 1.34 ± 0.10            | 1.87 ± 1.07                    | 0.7             |
| Lamotrigine    | 0.990 ± 0.066          | 1.06 ± 0.07                    | 0.9             |
| Ondansetron    | 0.885 ± 0.259          | 0.784 ± 0.350                  | 1.1             |
| E2074          | 1.05 ± 0.11            | 1.01 ± 0.76                    | 1.0             |
| Risperidone    | 0.458 ± 0.074          | 0.206 <sup>a</sup>             | 2.2             |
| Verapamil      | 0.406 ± 0.058          | 0.266 ± 0.158                  | 1.5             |
| Paliperidone   | 0.226 ± 0.061          | 0.258 ± 0.100                  | 0.9             |
| Desloratadine  | 0.195 ± 0.006          | 0.227 ± 0.066                  | 0.9             |
| Quinidine      | 0.278 ± 0.029          | 0.194 ± 0.052                  | 1.4             |

<sup>a</sup>Data from single animal because the  $C_{CSF}$  at 24 hours was below the quantification limit (< 0.1 ng/mL) in two out of three animals.

$K_{p,uu,lumbar\ CSF}$  and  $C_{csf}/C_{u,plasma}$  at 24 h are represented as mean ± SD.

(B) Part 2 (with and without zosuquidar co-treatment)

| Test compounds | Zosuquidar (-)           |                                             |                 | Zosuquidar (+)           |                                             |                 |
|----------------|--------------------------|---------------------------------------------|-----------------|--------------------------|---------------------------------------------|-----------------|
|                | $K_{p,uu,lumbar\ CSF}^a$ | $C_{CSF}/C_{u,plasma}$ at 24 h <sup>a</sup> | Fold difference | $K_{p,uu,lumbar\ CSF}^b$ | $C_{CSF}/C_{u,plasma}$ at 24 h <sup>a</sup> | Fold difference |
| Antipyrine     | 1.05 ± 0.04              | 1.11 ± 0.19                                 | 1.0             | 1.07 (1.05, 1.08)        | 1.04 ± 0.16                                 | 1.0             |
| Ondansetron    | 0.861 ± 0.096            | 0.422 ± 0.156                               | 2.0             | 1.08 (0.968, 1.19)       | 0.880 ± 0.297*                              | 1.2             |
| Desloratadine  | 0.151 ± 0.026            | 0.144 ± 0.026                               | 1.0             | 0.250 (0.264, 0.235)     | 0.268 ± 0.087                               | 0.9             |
| Quinidine      | 0.239 ± 0.011            | 0.271 ± 0.153                               | 0.9             | 0.987 (0.916, 1.06)      | 1.57 ± 0.86**                               | 0.6             |

<sup>a</sup>Mean ± SD of three animals.

<sup>b</sup>Mean of two animals with individual values given in the parenthesis.

\*:  $P < 0.05$ , \*\*:  $P < 0.01$  (Paired  $t$  test vs Zosuquidar (-))

(C) Correlation

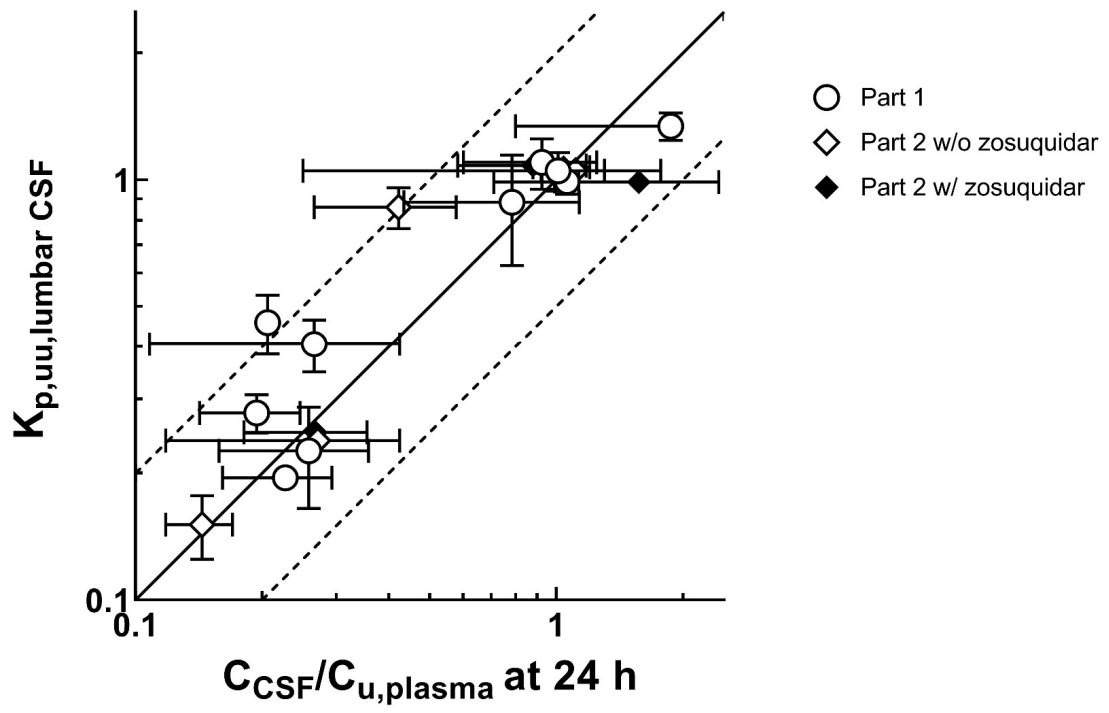

Supplement: DMD_000099_Revised_Supplemental_Table_2.pdf [file DMD_000099_Revised_Supplemental_Table_2.pdf]
